# Supplementary material for: Establishing the Prevalence of Osteomalacia in Arab Adolescents Using Biochemical Markers of Bone Health
Source: MDPI journal article supplement (doi:10.3390/nu14245354), 2022-12-16
Supplement: s1 [file s1]

**Table S1.** Age- and sex-specific normal ranges used for serum alkaline phosphatase (ALP) and inorganic phosphorous (Pi).

| Age groups (years) | Boys      | Girls     |
|--------------------|-----------|-----------|
| ALP (U/l) [16] *   |           |           |
| 1-9                | 156-369   | 156-369   |
| 10-12              | 141-460   | 141-460   |
| 13-14              | 127-517   | 62-280    |
| 15-16              | 89-365    | 54-128    |
| 17-18              | 59-164    | 48-95     |
| Pi (mmol/l) [17]   |           |           |
| 5-13               | 1.19-1.74 | 1.29-1.68 |
| 14-15              | 1.13-1.52 | 1.13-1.58 |
| 16-17              | 1.0-1.52  | 1.0-1.52  |

\*References ranges established from Abbott ARCHITECT analyser.

**Table S2.** Normality of Parameters Assessed.

| Parameters               | Girls      |            | Boys       |            |
|--------------------------|------------|------------|------------|------------|
|                          | Skewness   | Kurtosis   | Skewness   | Kurtosis   |
| N                        |            |            |            |            |
| Age (years)              | 0.3 ± 0.1  | -0.9 ± 0.1 | 0.1 ± 0.1  | -0.8 ± 0.1 |
| Height (cm)              | -0.1 ± 0.1 | 0.8 ± 0.1  | -0.6 ± 0.1 | 0.2 ± 0.1  |
| Weight (kg)              | 0.5 ± 0.1  | 0.0 ± 0.1  | 0.3 ± 0.1  | 0.5 ± 0.1  |
| BMI (kg/m <sup>2</sup> ) | 0.8 ± 0.1  | 1.4 ± 0.1  | 0.6 ± 0.1  | 0.9 ± 0.1  |
| Ca (mmol/l)              | -0.1 ± 0.1 | 2.4 ± 0.1  | 0.2 ± 0.1  | 3.1 ± 0.1  |
| Pi (mmol/l)              | 0.3 ± 0.1  | 0.3 ± 0.1  | 0.5 ± 0.1  | 2.4 ± 0.1  |
| ALP (U/l)                | 2.3 ± 0.1  | 7.6 ± 0.1  | 2.7 ± 0.1  | 9.7 ± 0.1  |
| 25(OH)D (nmol/l)         | 2.5 ± 0.1  | 8.7 ± 0.1  | 2.6 ± 0.1  | 16.7 ± 0.1 |

Note: For sample size >300, either an absolute skewness value ≤2 or an absolute kurtosis (excess) ≤4 are used as reference values for determining considerable normality [22, 23].
